# Supplementary material
Source: PubMed Central journal article supplement (PMC5332570)

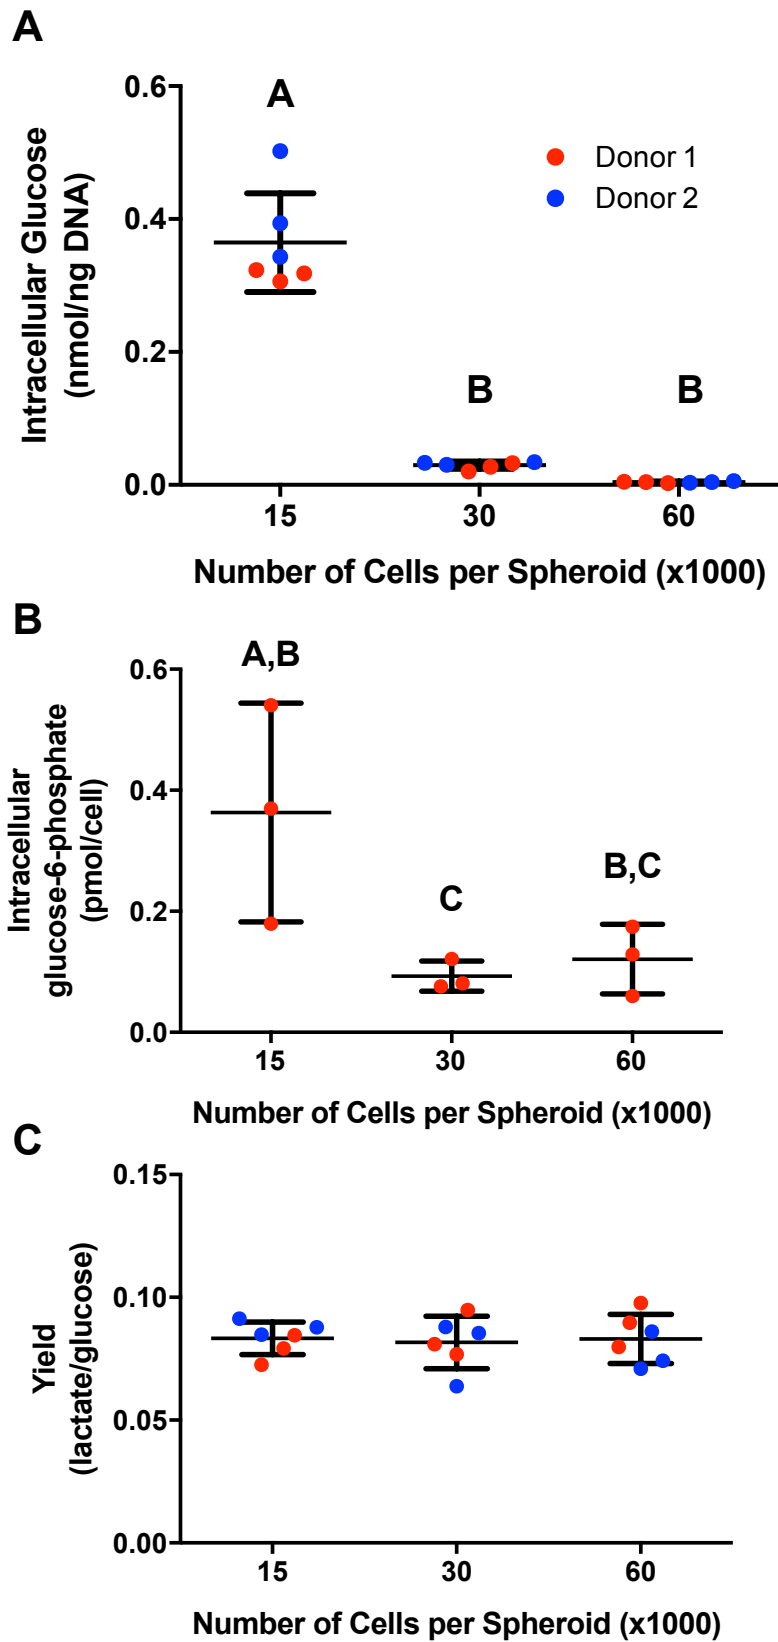

Supplement: rsif20160851supp1.pdf [file rsif20160851supp1.pdf]

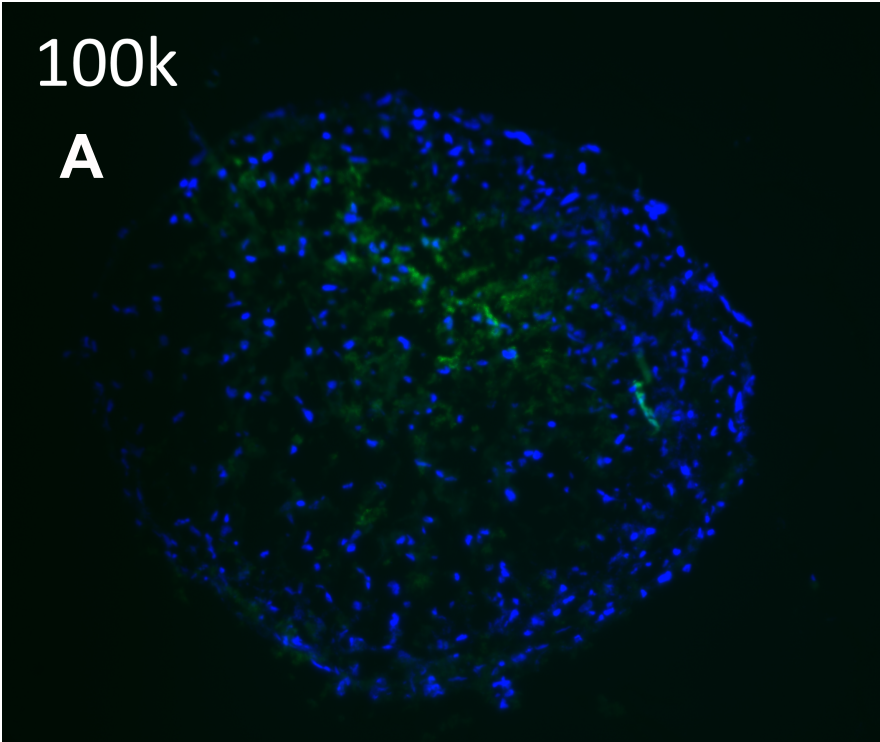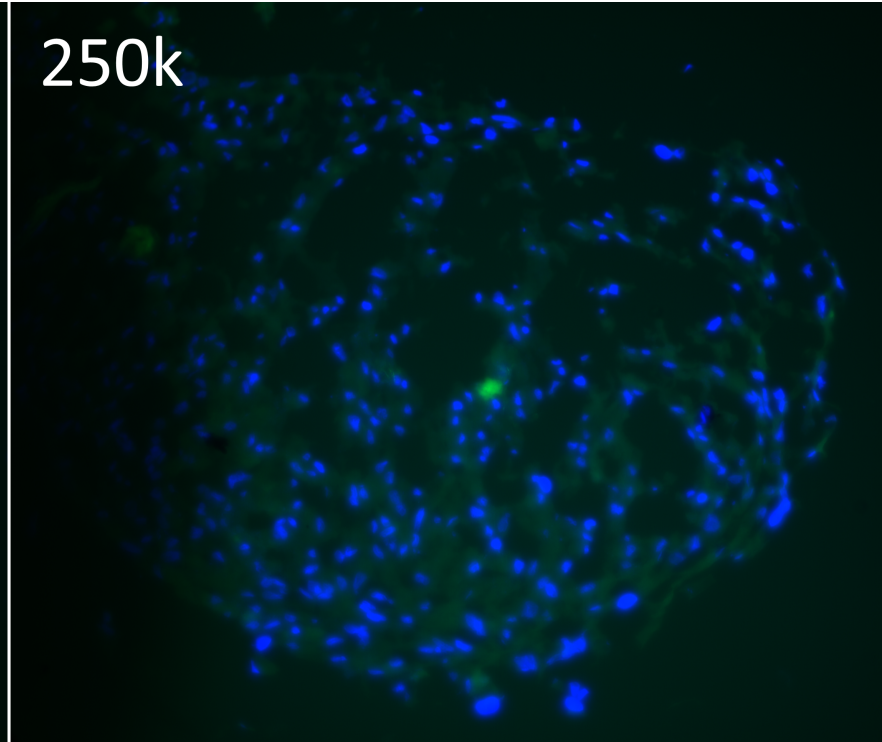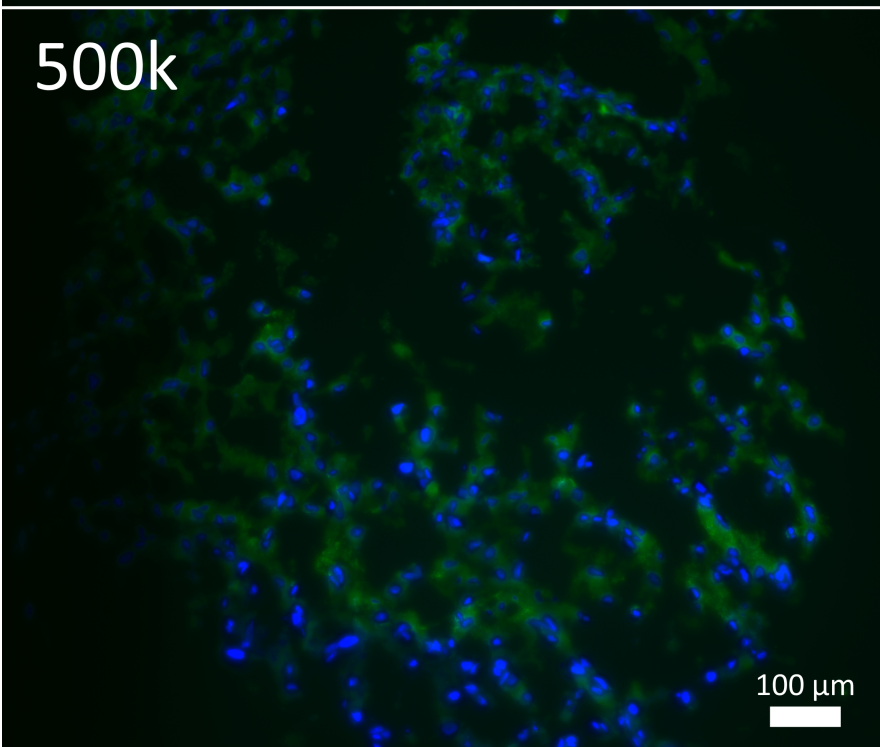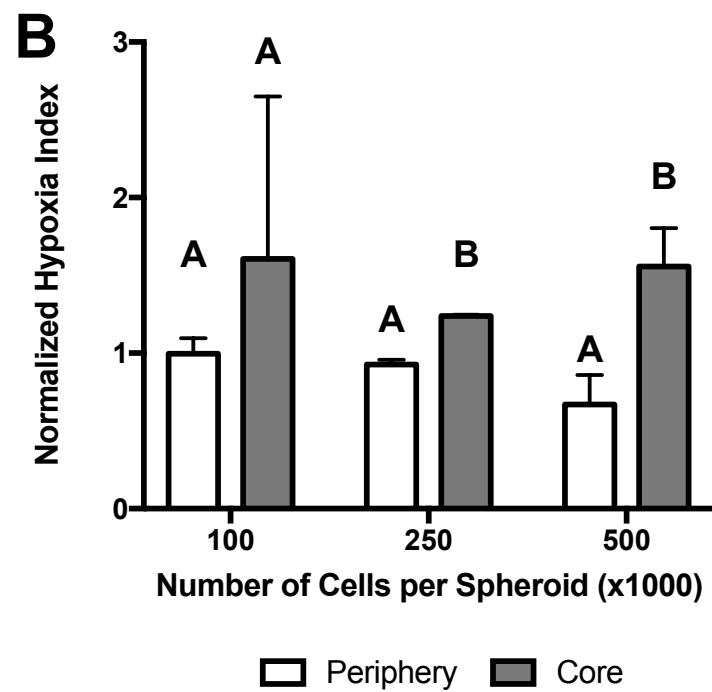

Supplement: rsif20160851supp2.pdf [file rsif20160851supp2.pdf]

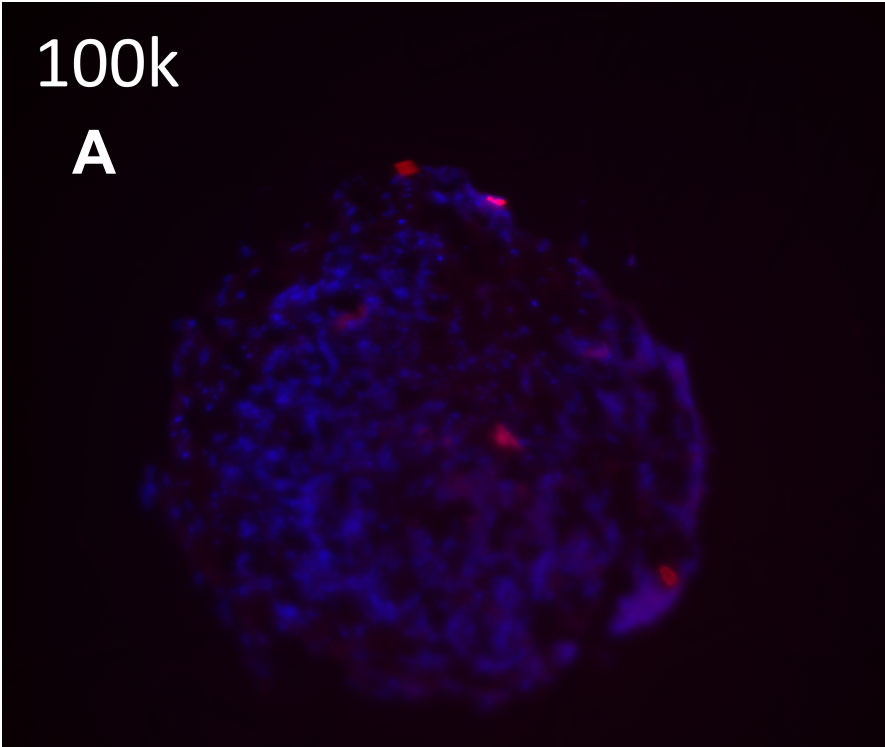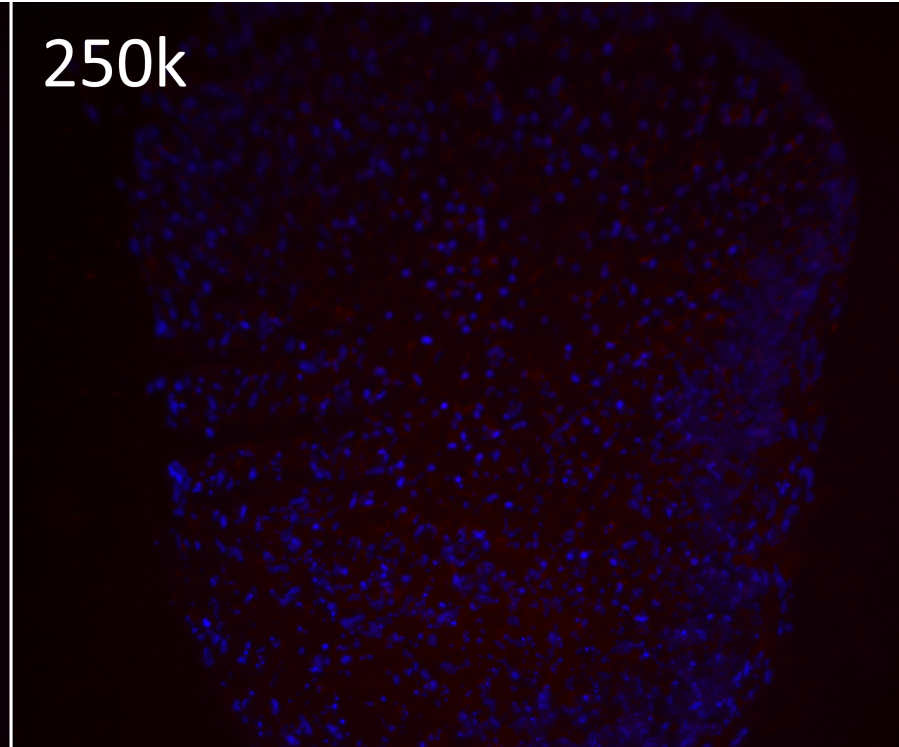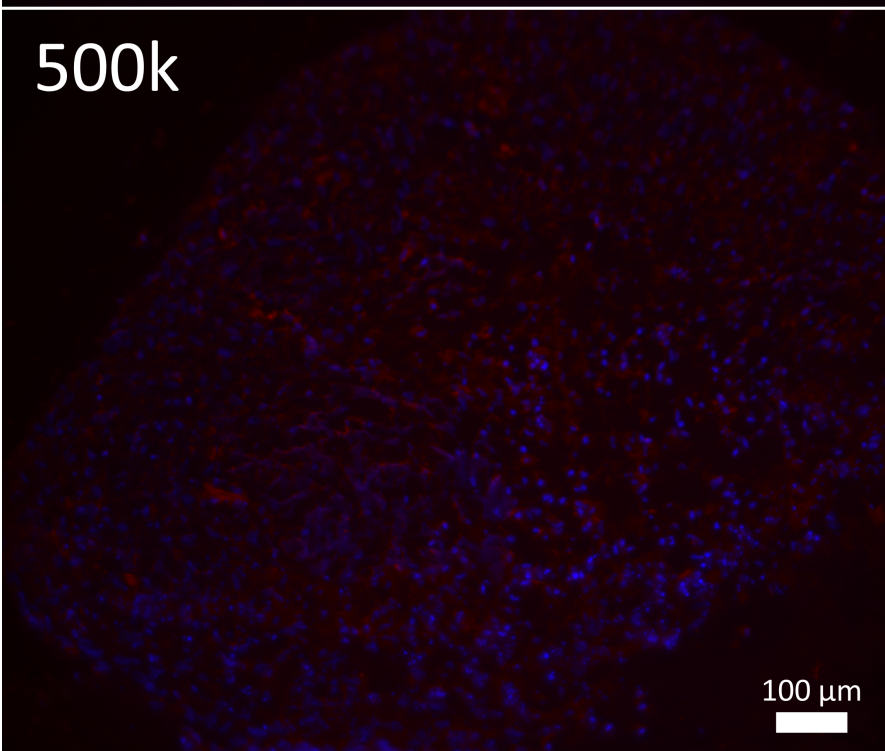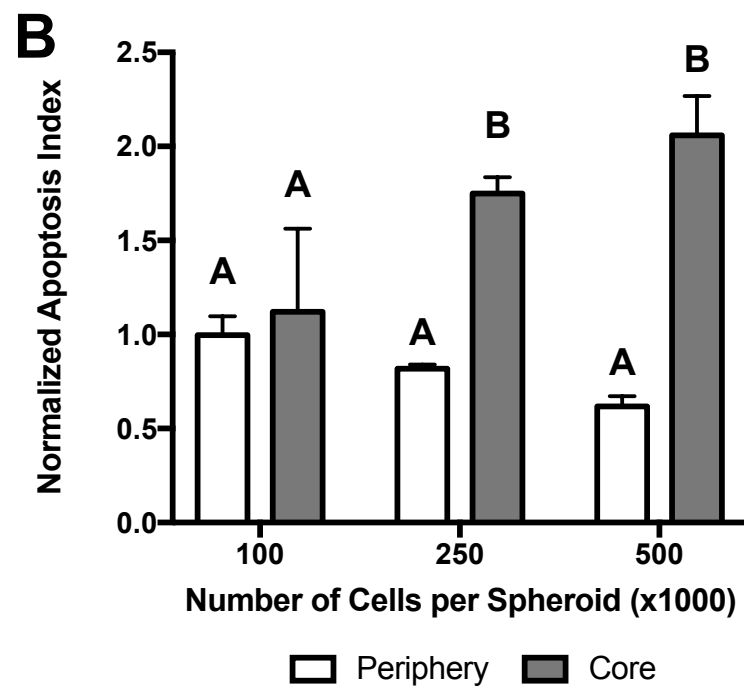

Supplement: rsif20160851supp3.pdf [file rsif20160851supp3.pdf]
